## CORRESPONDENCE

Anesthesiology

1997; 87:709

© 1997 American Society of Anesthesiologists, Inc.  
Lippincott-Raven Publishers

## Diltiazem for Ventricular Fibrillation

**To the Editor:**—Diltiazem, a calcium blocker, suppresses ventricular fibrillation induced by myocardial ischemia and improves resuscitability in animal experiments.<sup>1-3,\*</sup> Inhibition of the  $Ca^{++}$  influx into the myocardial cell,<sup>4</sup> reduction of the heart rate,<sup>2,3</sup> and enhancement of the electrical stability<sup>3</sup> may contribute to the improved resuscitation rate by diltiazem. Despite these encouraging results in animal experiments, there has been no clinical evaluation of the effects of diltiazem on ventricular fibrillation as of yet. We report a case of successful resuscitation by diltiazem from ventricular fibrillation, which resulted from acute myocardial infarction and was refractory to standard therapy.<sup>3</sup>

The patient was a 75-year-old man. He had a percutaneous transluminal coronary recanalization for acute myocardial infarction of the right coronary artery 2 yr ago from this April, but he has been well since then. On admission to the emergency room because of chest pain in this May, his consciousness was clear but ECG showed a complete AV block and ST segment elevations at II, III, and aVf leads. The patient suddenly developed ventricular fibrillation. After the endotracheal intubation and the initiation of external chest compression cardiac massage, defibrillation was sequentially attempted at 5 times with the energy of 200 J. Each defibrillation resulted in transient sinus tachycardia (heart rate was 100–120 beats/min), which lasted only for less than 1 min and ventricular fibrillation recurred (fig. 1). Because of tachycardia, epinephrine was withheld. Lidocaine, 50–100 mg, was administered intravenously before the last three defibrillation attempts (total dose of lidocaine was 200 mg). Then, diltiazem, 5 mg, was administered intravenously before the sixth defibrillation at 200 J. Ventricular fibrillation disappeared immediately after defibrillation (sinus rhythm with AV block; fig. 2). He recovered without any complications after the treatment with temporal ventricular pacing and tissue-type plasminogen activator. Although administration of diltiazem to a patient in complete AV block may be controversial, we administered diltiazem to a patient who was already in ventricular

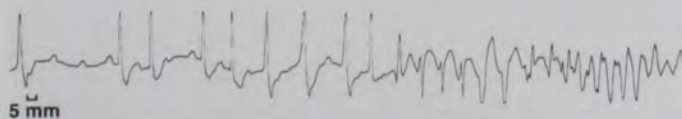

**Fig. 1** ECG strip after defibrillation with lidocaine. Transient restoration of sinus tachycardia and subsequent recurrence of ventricular fibrillation.

\* Kato H, Goto H, Mangold, JV, Tosne ER, Arakawa, K: Effects of diltiazem on hemodynamics after resuscitation from circulatory arrest in dogs (abstract). *ANESTHESIOLOGY* 1983; 59:A121.

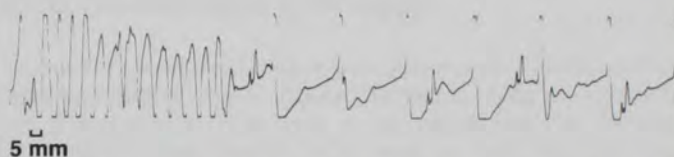

**Fig. 2** ECG strip after defibrillation with diltiazem. Restoration of sinus rhythm with AV block.

fibrillation. It is assumed that restoration of any type of sinus rhythm is of paramount importance. Although restoration of sinus rhythm might have been due to the doses of lidocaine, we assume that successful resuscitation was due to diltiazem because of the previous failure of the lidocaine alone. The dramatic response to diltiazem after unsuccessful efforts with lidocaine and defibrillation suggests that diltiazem might be worth trying in resuscitation from recurrent ventricular fibrillation.

**Kazuhiro Kishikawa, M.D.**  
**Yukihiro Kumeta, M.D.**  
**Chieko Kurihara, M.D.**  
**Hideko Endo, M.D.**  
**Akiyoshi Namiki, M.D.**  
Department of Anesthesiology  
Sapporo Medical College  
Minami 2, Nishi 16  
Sapporo 060, Japan

## References

1. Clusin W, Bristow MR, Baim DS, Schroeder JS, Jaillon P, Brett P, Harrison DC: The effects of diltiazem and reduced serum ionized calcium on ischemic ventricular fibrillation in the dog. *Circ Res* 1982; 50:518–26
2. Tosaki A, Szekeres L, Hearse DJ: Diltiazem and the reduction of reperfusion-induced arrhythmias in the rat: Protection is secondary to modification of ischemic injury and heart rate. *J Mol Cell Cardiol* 1987; 19:441–51
3. Capparelli EV, Hanyok JJ, Dipersio DM, Kluger J, Fieldman A, Chow MS: Diltiazem improves resuscitation from experimental ventricular fibrillation in dogs. *Crit Care Med* 1992; 20:1140–5
4. Emergency cardiac care committee and subcommittees, American Heart Association. Guidelines for cardiopulmonary resuscitation and emergency cardiac care. *JAMA* 1992; 268:2211–9

(Accepted for publication May 20, 1997.)
